# Supplementary material for: Regulating the size of antimony nanoparticles to enhance the photo-response in the near-infrared region and anti-hepatoma cell activity
Source: Frontiers journal article supplement (doi:10.3389/fbioe.2025.1656253), 2025-09-05
Supplement: Data_Sheet_1.pdf [file Data_Sheet_1.pdf]

## *Supplementary Material*

### **Regulating the Size of Antimony Nanoparticles to Enhance the Photo-response in the Near-infrared Region and Anti- hepatoma Cell Activity**

**Lingling Huang<sup>1†</sup>, Yimin Gong<sup>2,3,4†</sup>, Zhijian Chen<sup>5,6†</sup>, Yanjun Tan<sup>2,3</sup>, Qian Gao<sup>2,3</sup>, Yilei Wang<sup>2,3</sup>, Yuyu Gao<sup>2,3</sup>, Wanting Cheng<sup>2,3</sup>, Weiyuan Liang<sup>2,3\*</sup>, Xiaoli Yang<sup>1, 2,3\*</sup>**

**\* Correspondence:**

Xiaoli Yang: [cncsyxl@126.com](mailto:cncsyxl@126.com)

Weiyuan Liang: [lwydoct2020@163.com](mailto:lwydoct2020@163.com)

#### **1 Supplementary Figures**

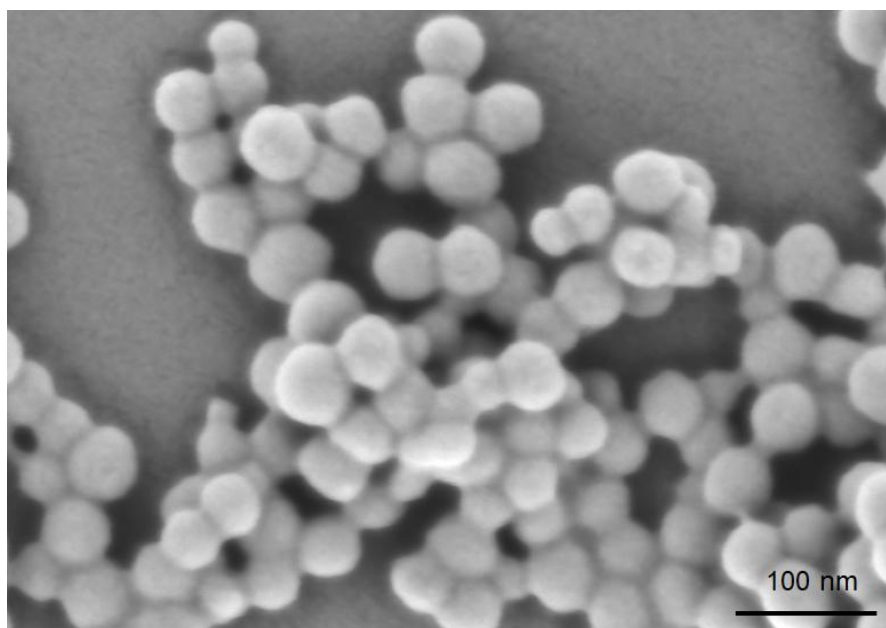

**Supplementary Figure S1.** SEM images of Sb NPs.

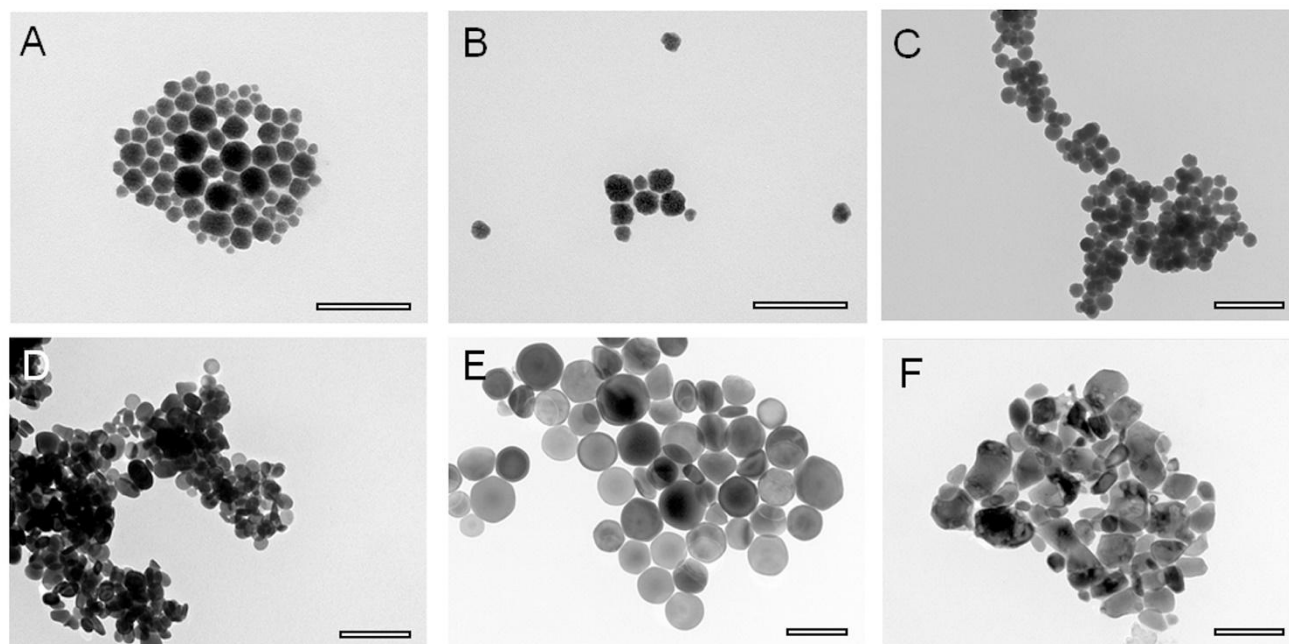

**Supplementary Figure S2.** Time-resolved TEM morphologies of Sb NPs. Morphologies of Sb NPs after reduced reaction for (A) 10 seconds; (B) 30 seconds; (C) 180 seconds; (D) 10 min; (E) 20 min; (F) 30 min, respectively. Scale bar: 200 nm.

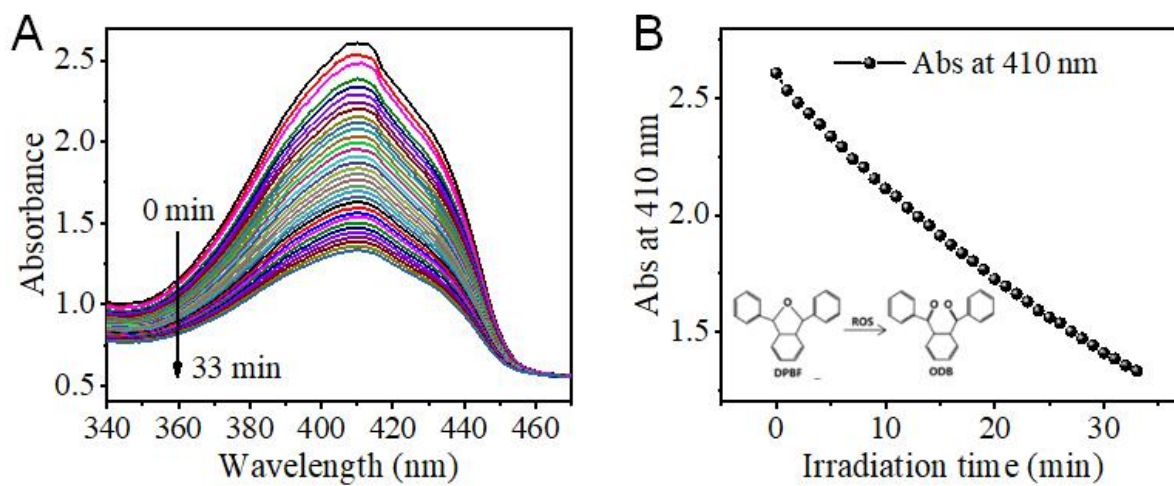

**Supplementary Figure S3.** UV absorbance spectra at 410 nm of DPBF in the solution of Sb NPs.

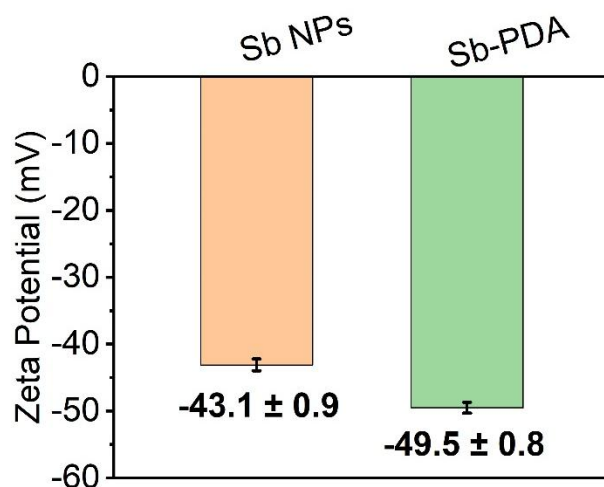

**Supplementary Figure S4.** Zeta-potential of Sb NPs and Sb-PDA.

**Supplementary Table S1.** Comparison of photothermal conversion efficiency (PTCE) from this research with those from previously published works on metallic and semiconductor nanomaterials for cancer treatment.

| Materials                                         | Laser irradiation | Photothermal conversion efficiency (PTCE) | Ref.      |
|---------------------------------------------------|-------------------|-------------------------------------------|-----------|
| 2D GeP nanosheets                                 | 808 nm            | 68.6%                                     | [1]       |
| Antimony nanopolyhedrons                          | 808 nm            | 62.1%                                     | [2]       |
| Au nanoparticles                                  | 808 nm            | 61%                                       | [3]       |
| Antimony nanoparticles (Sb-PDA)                   | 808 nm            | 59.3%                                     | This work |
| Antimonene Quantum Dots                           | 808 nm            | 45.5%                                     | [4]       |
| UCNPs@AgBiS <sub>2</sub> core-shell nanoparticles | 808 nm            | 45%                                       | [5]       |
| Sb–THPP–PEG nanosheets                            | 808 nm            | 44.6%                                     | [6]       |
| Black phosphorus nanosheets                       | 808 nm            | 38.8%                                     | [7]       |
| Cr-based nanoparticles (Cr-PDA)                   | 808 nm            | 37.4%                                     | [8]       |
| Nb <sub>2</sub> C nanosheets (Mxene)              | 808 nm            | 36.4%                                     | [9]       |
| L-cysteine modified MoS <sub>2</sub>              | 808 nm            | 35%                                       | [10]      |

## Reference

- [1] X. Ren, W. Liu, H. Zhou, et al. Biodegradable 2D GeP nanosheets with high photothermal conversion efficiency for multimodal cancer theranostics[J]. *Chemical Engineering Journal*, 2022, 431: 134176.
- [2] Y. Chen, M. Wang, K. Zheng, et al. Antimony Nanopolyhedrons with Tunable Localized Surface Plasmon Resonances for Highly Effective Photoacoustic-Imaging-Guided Synergistic Photothermal/Immunotherapy[J]. *Advanced Materials*, 2021, 33(18): 2100039.
- [3] J. Depciuch, M. Stec, A. Maximienko, et al. Size-dependent theoretical and experimental photothermal conversion efficiency of spherical gold nanoparticles[J]. *Photodiagnosis and Photodynamic Therapy*, 2022, 39: 102979.
- [4] W. Tao, X. Ji, X. Xu, et al. Antimonene Quantum Dots: Synthesis and Application as Near-Infrared Photothermal Agents for Effective Cancer Therapy[J]. *Angewandte Chemie International Edition*, 2017, 56(39): 11896-11900.
- [5] Z. Chu, T. Tian, Z. Tao, et al. Upconversion nanoparticles@AgBiS<sub>2</sub> core-shell nanoparticles with cancer-cell-specific cytotoxicity for combined photothermal and photodynamic therapy of cancers[J]. *Bioactive Materials*, 2022, 17: 71-80.
- [6] Y. Kang, Z. Li, Y. Yang, et al. Antimonene Nanosheets-Based Z-Scheme Heterostructure with Enhanced Reactive Oxygen Species Generation and Photothermal Conversion Efficiency for Photonic Therapy of Cancer[J]. *Advanced Healthcare Materials*, 2021, 10(3): 2001835.
- [7] M. Qiu, D. Wang, W. Liang, et al. Novel concept of the smart NIR-light-controlled drug release of black phosphorus nanostructure for cancer therapy[J]. *Proceedings of the National Academy of Sciences*, 2018, 115(3): 501.
- [8] Q. Liu, Z. Sun, Y. Duo, et al. Chromium Nanoparticles Improve Macrophage and T Cell Infiltration for Cancer Immunotherapy[J]. *ACS Materials Letters*, 2023, 5(6): 1738-1751.
- [9] H. Lin, S. Gao, C. Dai, et al. A Two-Dimensional Biodegradable Niobium Carbide (MXene) for Photothermal Tumor Eradication in NIR-I and NIR-II Biowindows[J]. *Journal of the American Chemical Society*, 2017, 139(45): 16235-16247.
- [10] L. Ding, Y. Chang, P. Yang, et al. Facile synthesis of biocompatible L-cysteine-modified MoS<sub>2</sub> nanospheres with high photothermal conversion efficiency for photothermal therapy of tumor[J]. *Materials Science and Engineering: C*, 2020, 117: 111371.
